# Supplementary material
Source: ML conference proceedings conference paper supplement (https://aclanthology.org/K19-1018)
Supplement: Supplementary_Material [file K19-1018.Supplementary_Material.zip]

# Generating Timelines by Modeling Semantic Change - Supplemental Material

## **A Questionnaire Screenshots**

Here we supply screenshots of the questionnaire we used for evaluating timelines. They show the instructions given to the evaluators, as well as the questions presented to them.

# Timelines of "Russia"

Each of the 4 timelines below contains major events that happened in the history of "Russia".

Please read them, and for each event that you know, use the vote buttons (✓/✗) to mark it as a correct/wrong event for its year.

If you mouse over an event, a tooltip will appear and show its summary from Wikipedia and a reference (a sentence from Wikipedia that contains the word "Russia"). Then, answer the questions below them for each of the timelines.

Before reading the timelines, how familiar are you with the history of "Russia"? (from worst (1) to best (4)).

## (a) Instructions to the evaluators

| Question                                                                                                            | Timeline 1           | Timeline 2           | Timeline 3           | Timeline 4           |
|---------------------------------------------------------------------------------------------------------------------|----------------------|----------------------|----------------------|----------------------|
| How relevant is the timeline for "Earthquake"? (from worst (1) to best (4)).                                        | <input type="text"/> | <input type="text"/> | <input type="text"/> | <input type="text"/> |
| Do you know of any important events that are missing from the timeline? How many?                                   | <input type="text"/> | <input type="text"/> | <input type="text"/> | <input type="text"/> |
| Does the timeline contain redundant events? How many?                                                               | <input type="text"/> | <input type="text"/> | <input type="text"/> | <input type="text"/> |
| How familiar are you with the history of "Earthquake" now, after reading the timeline? (from worst (1) to best (4)) | <input type="text"/> | <input type="text"/> | <input type="text"/> | <input type="text"/> |
| Please rank the timelines, from worst (1) to best (4).                                                              | <input type="text"/> | <input type="text"/> | <input type="text"/> | <input type="text"/> |

## (b) Questions presented in the questionnaire
